# Supplementary material
Source: MDPI journal article supplement (https://www.mdpi.com/2227-9717/8/10/1306)
Supplement: s1 [file s1]

Table S1. Stoichiometry for carbon oxidation, nitrification, and denitrification.

| Component →   j |                                              | 2                | 4         | 5                                 | 6        | 7        | 8     | 9                             | 10                 | 11                           | 12       | 13                    | 14                                                   | 17                                  |
|-----------------|----------------------------------------------|------------------|-----------|-----------------------------------|----------|----------|-------|-------------------------------|--------------------|------------------------------|----------|-----------------------|------------------------------------------------------|-------------------------------------|
| w               | Process ↓                                    | $S_S$            | $X_S$     | $X_{BH}$                          | $X_{NS}$ | $X_{NB}$ | $X_P$ | $S_O$                         | $S_{NO3}$          | $S_{NH}$                     | $S_{ND}$ | $X_{ND}$              | $S_{AB}$                                             | $S_{NO2}$                           |
| 1               | Aerobic growth of heterotrophs               | $-\frac{1}{Y_H}$ |           | $(1 - \frac{X_{BH}}{X_{BH,max}})$ |          |          |       | $-\frac{1-Y_H}{Y_H}$          |                    | $-i_{XB}$                    |          |                       | $-\frac{i_{XB}}{14}$                                 |                                     |
| 2               | Anoxic growth of heterotrophs on $S_{NO3}$   | $-\frac{1}{Y_H}$ |           | $(1 - \frac{X_{BH}}{X_{BH,max}})$ |          |          |       | $-\frac{1-Y_H}{1.14Y_H}$      |                    | $-i_{XB}$                    |          |                       | $\frac{1-Y_H}{14 \cdot 1.14Y_H} - \frac{i_{XB}}{14}$ | $\frac{1}{1.14} \frac{1-Y_H}{Y_H}$  |
| 3               | Anoxic growth of heterotrophs on $S_{NO2}$   | $-\frac{1}{Y_H}$ |           | $(1 - \frac{X_{BH}}{X_{BH,max}})$ |          |          |       |                               |                    | $-i_{XB}$                    |          |                       | $\frac{1-Y_H}{14 \cdot 1.72Y_H} - \frac{i_{XB}}{14}$ | $-\frac{1}{1.72} \frac{1-Y_H}{Y_H}$ |
| 4               | Aerobic growth of ammonia oxidizing bacteria |                  |           |                                   | 1        |          |       | $-\frac{3.43-Y_{NS}}{Y_{NS}}$ |                    | $-i_{XB} - \frac{1}{Y_{NS}}$ |          |                       | $-\frac{i_{XB}}{14} - \frac{1}{Y_{NS}}$              | $\frac{1}{Y_{NS}}$                  |
| 5               | Aerobic growth of nitrite oxidizing bacteria |                  |           |                                   |          | 1        |       | $-\frac{1.14-Y_{NB}}{Y_{NB}}$ | $\frac{1}{Y_{NB}}$ | $-i_{XB}$                    |          |                       | $-\frac{i_{XB}}{14}$                                 | $-\frac{1}{Y_{NB}}$                 |
| 6               | Decay of heterotrophs                        |                  | $1 - f_P$ | -1                                |          |          | $f_P$ |                               |                    |                              |          | $i_{XB} - f_P i_{XP}$ |                                                      |                                     |
| 7               | Decay of ammonia oxidizing bacteria          |                  | $1 - f_P$ |                                   | -1       |          | $f_P$ |                               |                    |                              |          | $i_{XB} - f_P i_{XP}$ |                                                      |                                     |
| 8               | Decay of nitrite oxidizing bacteria          |                  | $1 - f_P$ |                                   |          | -1       | $f_P$ |                               |                    |                              |          | $i_{XB} - f_P i_{XP}$ |                                                      |                                     |
| 9               | Ammonification of soluble organic nitrogen   |                  |           |                                   |          |          |       |                               |                    | 1                            | -1       |                       | $\frac{1}{14}$                                       |                                     |
| 10              | 'Hydrolysis' of entrapped organics           | 1                | -1        |                                   |          |          |       |                               |                    |                              |          |                       |                                                      |                                     |
| 11              | 'Hydrolysis' of entrapped organic nitrogen   |                  |           |                                   |          |          |       |                               |                    |                              | 1        | -1                    |                                                      |                                     |
