# Supplementary material
Source: MDPI journal article supplement (https://www.mdpi.com/2227-9717/8/10/1306)
Supplement: s1 [file s1]

Table S2. Process kinetics for carbon oxidation, nitrification, and denitrification.

| w  | Process                                      | Process Rates $\rho_w$                                                                                                                                                                                  |
|----|----------------------------------------------|---------------------------------------------------------------------------------------------------------------------------------------------------------------------------------------------------------|
| 1  | Aerobic growth of heterotrophs               | $\mu_H \left( \frac{S_S}{K_S + S_S} \right) \left( \frac{S_O}{K_{OH} + S_O} \right) \left( \frac{S_{NH}}{K_{NH} + S_{NH}} \right) X_{BH}$                                                               |
| 2  | Anoxic growth of heterotrophs on $S_{NO3}$   | $\eta_{NO3} \mu_H \left( \frac{S_S}{K_S + S_S} \right) \left( \frac{K_{OH}}{K_{OH} + S_O} \right) \left( \frac{S_{NO3}}{K_{NO} + S_{NO3}} \right) \left( \frac{S_{NH}}{K_{NH} + S_{NH}} \right) X_{BH}$ |
| 3  | Anoxic growth of heterotrophs on $S_{NO2}$   | $\eta_{NO2} \mu_H \left( \frac{S_S}{K_S + S_S} \right) \left( \frac{K_{OH}}{K_{OH} + S_O} \right) \left( \frac{S_{NO2}}{K_{NO} + S_{NO2}} \right) \left( \frac{S_{NH}}{K_{NH} + S_{NH}} \right) X_{BH}$ |
| 4  | Aerobic growth of ammonia oxidizing bacteria | $\mu_{NS} \left( \frac{S_{NH}}{K_{NH} + S_{NH}} \right) \left( \frac{S_O}{K_{OA} + S_O} \right) X_{NS}$                                                                                                 |
| 5  | Aerobic growth of nitrite oxidizing bacteria | $\mu_{NB} \left( \frac{S_{NO2}}{K_{NO} + S_{NO2}} \right) \left( \frac{S_O}{K_{OA} + S_O} \right) X_{NB}$                                                                                               |
| 6  | Decay of heterotrophs                        | $b_H X_{BH}$                                                                                                                                                                                            |
| 7  | Decay of ammonia oxidizing bacteria          | $b_{NS} X_{NS}$                                                                                                                                                                                         |
| 8  | Decay of nitrite oxidizing bacteria          | $b_{NB} X_{NB}$                                                                                                                                                                                         |
| 9  | Ammonification of soluble organic nitrogen   | $k_a S_{ND} X_{BH}$                                                                                                                                                                                     |
| 10 | 'Hydrolysis' of entrapped organics           | $k_h \frac{X_S}{K_X X_{BH} + X_S} \left( \frac{S_O}{K_{OH} + S_O} + \eta_h \frac{K_{OH}}{K_{OH} + S_O} \left[ \frac{S_{NO2} + S_{NO3}}{K_{NO} + S_{NO2} + S_{NO3}} \right] \right) X_{BH}$              |
| 11 | 'Hydrolysis' of entrapped organic nitrogen   | $\rho_T (X_{ND} / X_S)$                                                                                                                                                                                 |
